# Supplementary material for: Mixed effects of ecological intensification on natural pest control providers: a short-term study for biotic homogenization in winter wheat fields
Source: PeerJ. 2020 Mar 27;8:e8746. doi: 10.7717/peerj.8746 (PMC7104717; doi:10.7717/peerj.8746)
Supplement: Supplemental Information 4 — Referred to as ”(data = spots)” in the R code [file peerj-08-8746-s004.xls]

## Sheet: dataset
farm	config	nitrogen	pH	SOC	landscape	leaf.spots
w04-P12	w.setasides	no	5.56	1.674	complex	0
w04-P12	w.setasides	no	5.56	1.674	complex	3
w04-P12	w.setasides	no	5.56	1.674	complex	1
w04-P12	w.setasides	no	5.56	1.674	complex	1
w04-P12	w.setasides	no	5.56	1.674	complex	0
w04-P12	w.setasides	no	5.56	1.674	complex	3
w04-P12	w.setasides	yes	5.56	1.674	complex	2
w04-P12	w.setasides	yes	5.56	1.674	complex	0
w04-P12	w.setasides	yes	5.56	1.674	complex	0
w04-P12	w.setasides	yes	5.56	1.674	complex	1
w04-P12	w.setasides	yes	5.56	1.674	complex	0
w04-P12	w.setasides	yes	5.56	1.674	complex	1
w04-P12	w.setasides	no	5.56	1.674	complex	9
w04-P12	w.setasides	no	5.56	1.674	complex	8
w04-P12	w.setasides	no	5.56	1.674	complex	13
w04-P12	w.setasides	no	5.56	1.674	complex	6
w04-P12	w.setasides	no	5.56	1.674	complex	9
w04-P12	w.setasides	no	5.56	1.674	complex	5
w04-P12	w.setasides	yes	5.56	1.674	complex	12
w04-P12	w.setasides	yes	5.56	1.674	complex	5
w04-P12	w.setasides	yes	5.56	1.674	complex	6
w04-P12	w.setasides	yes	5.56	1.674	complex	3
w04-P12	w.setasides	yes	5.56	1.674	complex	7
w04-P12	w.setasides	yes	5.56	1.674	complex	3
w04-P12	w.setasides	no	5.56	1.674	complex	0
w04-P12	w.setasides	no	5.56	1.674	complex	0
w04-P12	w.setasides	no	5.56	1.674	complex	0
w04-P12	w.setasides	no	5.56	1.674	complex	0
w04-P12	w.setasides	no	5.56	1.674	complex	0
w04-P12	w.setasides	no	5.56	1.674	complex	0
w04-P12	w.setasides	yes	5.56	1.674	complex	0
w04-P12	w.setasides	yes	5.56	1.674	complex	0
w04-P12	w.setasides	yes	5.56	1.674	complex	0
w04-P12	w.setasides	yes	5.56	1.674	complex	0
w04-P12	w.setasides	yes	5.56	1.674	complex	0
w04-P12	w.setasides	yes	5.56	1.674	complex	0
w04-P12	w.setasides	no	5.56	1.674	complex	0
w04-P12	w.setasides	no	5.56	1.674	complex	0
w04-P12	w.setasides	no	5.56	1.674	complex	0
w04-P12	w.setasides	no	5.56	1.674	complex	0
w04-P12	w.setasides	no	5.56	1.674	complex	0
w04-P12	w.setasides	no	5.56	1.674	complex	0
w04-P12	w.setasides	yes	5.56	1.674	complex	0
w04-P12	w.setasides	yes	5.56	1.674	complex	0
w04-P12	w.setasides	yes	5.56	1.674	complex	0
w04-P12	w.setasides	yes	5.56	1.674	complex	0
w04-P12	w.setasides	yes	5.56	1.674	complex	0
w04-P12	w.setasides	yes	5.56	1.674	complex	0
w09-P5	w.setasides	no	5.14	1.47	complex	0
w09-P5	w.setasides	no	5.14	1.47	complex	3
w09-P5	w.setasides	no	5.14	1.47	complex	4
w09-P5	w.setasides	no	5.14	1.47	complex	2
w09-P5	w.setasides	no	5.14	1.47	complex	3
w09-P5	w.setasides	no	5.14	1.47	complex	2
w09-P5	w.setasides	yes	5.14	1.47	complex	0
w09-P5	w.setasides	yes	5.14	1.47	complex	5
w09-P5	w.setasides	yes	5.14	1.47	complex	0
w09-P5	w.setasides	yes	5.14	1.47	complex	4
w09-P5	w.setasides	yes	5.14	1.47	complex	2
w09-P5	w.setasides	yes	5.14	1.47	complex	3
w09-P5	w.setasides	no	5.14	1.47	complex	0
w09-P5	w.setasides	no	5.14	1.47	complex	3
w09-P5	w.setasides	no	5.14	1.47	complex	2
w09-P5	w.setasides	no	5.14	1.47	complex	4
w09-P5	w.setasides	no	5.14	1.47	complex	2
w09-P5	w.setasides	no	5.14	1.47	complex	5
w09-P5	w.setasides	yes	5.14	1.47	complex	0
w09-P5	w.setasides	yes	5.14	1.47	complex	3
w09-P5	w.setasides	yes	5.14	1.47	complex	1
w09-P5	w.setasides	yes	5.14	1.47	complex	3
w09-P5	w.setasides	yes	5.14	1.47	complex	1
w09-P5	w.setasides	yes	5.14	1.47	complex	2
w09-P5	w.setasides	no	5.14	1.47	complex	0
w09-P5	w.setasides	no	5.14	1.47	complex	0
w09-P5	w.setasides	no	5.14	1.47	complex	0
w09-P5	w.setasides	no	5.14	1.47	complex	0
w09-P5	w.setasides	no	5.14	1.47	complex	0
w09-P5	w.setasides	no	5.14	1.47	complex	0
w09-P5	w.setasides	yes	5.14	1.47	complex	0
w09-P5	w.setasides	yes	5.14	1.47	complex	0
w09-P5	w.setasides	yes	5.14	1.47	complex	0
w09-P5	w.setasides	yes	5.14	1.47	complex	0
w09-P5	w.setasides	yes	5.14	1.47	complex	0
w09-P5	w.setasides	yes	5.14	1.47	complex	0
w09-P5	w.setasides	no	5.14	1.47	complex	0
w09-P5	w.setasides	no	5.14	1.47	complex	0
w09-P5	w.setasides	no	5.14	1.47	complex	0
w09-P5	w.setasides	no	5.14	1.47	complex	0
w09-P5	w.setasides	no	5.14	1.47	complex	0
w09-P5	w.setasides	no	5.14	1.47	complex	0
w09-P5	w.setasides	yes	5.14	1.47	complex	0
w09-P5	w.setasides	yes	5.14	1.47	complex	0
w09-P5	w.setasides	yes	5.14	1.47	complex	0
w09-P5	w.setasides	yes	5.14	1.47	complex	0
w09-P5	w.setasides	yes	5.14	1.47	complex	0
w09-P5	w.setasides	yes	5.14	1.47	complex	0
wp32-w15-p4	w.setasides	no	6.59	2.454	complex	1
wp32-w15-p4	w.setasides	no	6.59	2.454	complex	3
wp32-w15-p4	w.setasides	no	6.59	2.454	complex	0
wp32-w15-p4	w.setasides	no	6.59	2.454	complex	0
wp32-w15-p4	w.setasides	no	6.59	2.454	complex	0
wp32-w15-p4	w.setasides	no	6.59	2.454	complex	1
wp32-w15-p4	w.setasides	yes	6.59	2.454	complex	0
wp32-w15-p4	w.setasides	yes	6.59	2.454	complex	1
wp32-w15-p4	w.setasides	yes	6.59	2.454	complex	3
wp32-w15-p4	w.setasides	yes	6.59	2.454	complex	0
wp32-w15-p4	w.setasides	yes	6.59	2.454	complex	0
wp32-w15-p4	w.setasides	yes	6.59	2.454	complex	0
wp32-w15-p4	w.setasides	no	6.59	2.454	complex	0
wp32-w15-p4	w.setasides	no	6.59	2.454	complex	0
wp32-w15-p4	w.setasides	no	6.59	2.454	complex	0
wp32-w15-p4	w.setasides	no	6.59	2.454	complex	0
wp32-w15-p4	w.setasides	no	6.59	2.454	complex	0
wp32-w15-p4	w.setasides	no	6.59	2.454	complex	0
wp32-w15-p4	w.setasides	yes	6.59	2.454	complex	0
wp32-w15-p4	w.setasides	yes	6.59	2.454	complex	0
wp32-w15-p4	w.setasides	yes	6.59	2.454	complex	0
wp32-w15-p4	w.setasides	yes	6.59	2.454	complex	0
wp32-w15-p4	w.setasides	yes	6.59	2.454	complex	0
wp32-w15-p4	w.setasides	yes	6.59	2.454	complex	0
wp32-w2-p2	w.setasides	no	6.18	2.232	simple	17
wp32-w2-p2	w.setasides	no	6.18	2.232	simple	17
wp32-w2-p2	w.setasides	no	6.18	2.232	simple	17
wp32-w2-p2	w.setasides	no	6.18	2.232	simple	17
wp32-w2-p2	w.setasides	no	6.18	2.232	simple	17
wp32-w2-p2	w.setasides	no	6.18	2.232	simple	17
wp32-w2-p2	w.setasides	yes	6.18	2.232	simple	13
wp32-w2-p2	w.setasides	yes	6.18	2.232	simple	17
wp32-w2-p2	w.setasides	yes	6.18	2.232	simple	17
wp32-w2-p2	w.setasides	yes	6.18	2.232	simple	16
wp32-w2-p2	w.setasides	yes	6.18	2.232	simple	17
wp32-w2-p2	w.setasides	yes	6.18	2.232	simple	17
wp32-w2-p2	w.setasides	no	6.18	2.232	simple	0
wp32-w2-p2	w.setasides	no	6.18	2.232	simple	0
wp32-w2-p2	w.setasides	no	6.18	2.232	simple	0
wp32-w2-p2	w.setasides	no	6.18	2.232	simple	0
wp32-w2-p2	w.setasides	no	6.18	2.232	simple	0
wp32-w2-p2	w.setasides	no	6.18	2.232	simple	0
wp32-w2-p2	w.setasides	yes	6.18	2.232	simple	0
wp32-w2-p2	w.setasides	yes	6.18	2.232	simple	0
wp32-w2-p2	w.setasides	yes	6.18	2.232	simple	0
wp32-w2-p2	w.setasides	yes	6.18	2.232	simple	0
wp32-w2-p2	w.setasides	yes	6.18	2.232	simple	0
wp32-w2-p2	w.setasides	yes	6.18	2.232	simple	0
wp32-w2-p2	w.setasides	no	6.18	2.232	simple	0
wp32-w2-p2	w.setasides	no	6.18	2.232	simple	0
wp32-w2-p2	w.setasides	no	6.18	2.232	simple	0
wp32-w2-p2	w.setasides	no	6.18	2.232	simple	0
wp32-w2-p2	w.setasides	no	6.18	2.232	simple	0
wp32-w2-p2	w.setasides	no	6.18	2.232	simple	0
wp32-w21-p3	w.setasides	no	4.74	1.806	complex	0
wp32-w21-p3	w.setasides	no	4.74	1.806	complex	0
wp32-w21-p3	w.setasides	no	4.74	1.806	complex	0
wp32-w21-p3	w.setasides	no	4.74	1.806	complex	0
wp32-w21-p3	w.setasides	no	4.74	1.806	complex	0
wp32-w21-p3	w.setasides	no	4.74	1.806	complex	0
wp32-w21-p3	w.setasides	yes	4.74	1.806	complex	0
wp32-w21-p3	w.setasides	yes	4.74	1.806	complex	0
wp32-w21-p3	w.setasides	yes	4.74	1.806	complex	0
wp32-w21-p3	w.setasides	yes	4.74	1.806	complex	0
wp32-w21-p3	w.setasides	yes	4.74	1.806	complex	0
wp32-w21-p3	w.setasides	yes	4.74	1.806	complex	0
wp32-w3-p1	w.setasides	no	5.27	2.286	simple	0
wp32-w3-p1	w.setasides	no	5.27	2.286	simple	0
wp32-w3-p1	w.setasides	no	5.27	2.286	simple	0
wp32-w3-p1	w.setasides	no	5.27	2.286	simple	0
wp32-w3-p1	w.setasides	no	5.27	2.286	simple	0
wp32-w3-p1	w.setasides	yes	5.27	2.286	simple	0
wp32-w3-p1	w.setasides	yes	5.27	2.286	simple	0
wp32-w3-p1	w.setasides	yes	5.27	2.286	simple	0
wp32-w3-p1	w.setasides	yes	5.27	2.286	simple	0
wp32-w3-p1	w.setasides	yes	5.27	2.286	simple	0
wp32-w3-p1	w.setasides	yes	5.27	2.286	simple	0
wp32-w3-p1	w.setasides	yes	5.27	2.286	simple	0
wp32-w3-p1	w.setasides	no	5.27	2.286	simple	0
wp32-w3-p1	w.setasides	no	5.27	2.286	simple	0
wp32-w3-p1	w.setasides	no	5.27	2.286	simple	0
wp32-w3-p1	w.setasides	no	5.27	2.286	simple	0
wp32-w3-p1	w.setasides	no	5.27	2.286	simple	0
wp32-w3-p1	w.setasides	no	5.27	2.286	simple	0
wp32-w3-p1	w.setasides	yes	5.27	2.286	simple	0
wp32-w3-p1	w.setasides	yes	5.27	2.286	simple	0
wp32-w3-p1	w.setasides	yes	5.27	2.286	simple	0
wp32-w3-p1	w.setasides	yes	5.27	2.286	simple	0
wp32-w3-p1	w.setasides	yes	5.27	2.286	simple	0
wp32-w3-p1	w.setasides	yes	5.27	2.286	simple	0
wp32-w3a-p5	w.setasides	no	5.27	1.842	complex	4
wp32-w3a-p5	w.setasides	no	5.27	1.842	complex	6
wp32-w3a-p5	w.setasides	no	5.27	1.842	complex	6
wp32-w3a-p5	w.setasides	no	5.27	1.842	complex	6
wp32-w3a-p5	w.setasides	yes	5.27	1.842	complex	4
wp32-w3a-p5	w.setasides	yes	5.27	1.842	complex	5
wp32-w3a-p5	w.setasides	no	5.27	1.842	complex	7
wp32-w3a-p5	w.setasides	no	5.27	1.842	complex	14
wp32-w3a-p5	w.setasides	yes	5.27	1.842	complex	2
wp32-w3a-p5	w.setasides	yes	5.27	1.842	complex	3
wp32-w3a-p5	w.setasides	yes	5.27	1.842	complex	4
wp32-w3a-p5	w.setasides	yes	5.27	1.842	complex	2
wp32-w3a-p5	w.setasides	no	5.27	1.842	simple	0
wp32-w3a-p5	w.setasides	no	5.27	1.842	simple	0
wp32-w3a-p5	w.setasides	no	5.27	1.842	simple	0
wp32-w3a-p5	w.setasides	no	5.27	1.842	simple	0
wp32-w3a-p5	w.setasides	no	5.27	1.842	simple	0
wp32-w3a-p5	w.setasides	no	5.27	1.842	simple	0
wp32-w3a-p5	w.setasides	yes	5.27	1.842	simple	0
wp32-w3a-p5	w.setasides	yes	5.27	1.842	simple	0
wp32-w3a-p5	w.setasides	yes	5.27	1.842	simple	0
wp32-w3a-p5	w.setasides	yes	5.27	1.842	simple	0
wp32-w3a-p5	w.setasides	yes	5.27	1.842	simple	0
wp32-w3a-p5	w.setasides	yes	5.27	1.842	simple	0
wp32-w3a-p5	w.setasides	no	5.27	1.842	simple	0
wp32-w3a-p5	w.setasides	no	5.27	1.842	simple	0
wp32-w3a-p5	w.setasides	no	5.27	1.842	simple	0
wp32-w3a-p5	w.setasides	no	5.27	1.842	simple	0
wp32-w3a-p5	w.setasides	no	5.27	1.842	simple	0
wp32-w3a-p5	w.setasides	no	5.27	1.842	simple	0
wp32-w3a-p5	w.setasides	yes	5.27	1.842	simple	0
wp32-w3a-p5	w.setasides	yes	5.27	1.842	simple	0
wp32-w3a-p5	w.setasides	yes	5.27	1.842	simple	0
wp32-w3a-p5	w.setasides	yes	5.27	1.842	simple	0
wp32-w3a-p5	w.setasides	yes	5.27	1.842	simple	0
wp32-w3a-p5	w.setasides	yes	5.27	1.842	simple	0
W01-P9	n.setasides	no	5.31	1.8496	complex	0
W01-P9	n.setasides	yes	5.31	1.8496	complex	0
W01-P9	n.setasides	yes	5.31	1.8496	complex	0
W01-P9	n.setasides	no	5.31	1.8496	complex	0
W01-P9	n.setasides	no	5.31	1.8496	complex	0
W01-P9	n.setasides	yes	5.31	1.8496	complex	0
W01-P9	n.setasides	no	5.31	1.8496	complex	0
W01-P9	n.setasides	yes	5.31	1.8496	complex	0
W01-P9	n.setasides	no	5.31	1.8496	complex	0
W01-P9	n.setasides	yes	5.31	1.8496	complex	0
W04-P12	n.setasides	no	5.56	1.8972	complex	0
W04-P12	n.setasides	yes	5.56	1.8972	complex	1
W04-P12	n.setasides	no	5.56	1.8972	complex	0
W04-P12	n.setasides	yes	5.56	1.8972	complex	0
W04-P12	n.setasides	no	5.56	1.8972	complex	0
W04-P12	n.setasides	yes	5.56	1.8972	complex	0
W04-P12	n.setasides	no	5.56	1.8972	complex	0
W04-P12	n.setasides	yes	5.56	1.8972	complex	0
W07-P4	n.setasides	no	6.64	1.7816	complex	3
W07-P4	n.setasides	no	6.64	1.7816	complex	0
W07-P4	n.setasides	yes	6.64	1.7816	complex	1
W07-P4	n.setasides	yes	6.64	1.7816	complex	6
W07-P4	n.setasides	yes	6.64	1.7816	complex	0
W07-P4	n.setasides	yes	6.64	1.7816	complex	0
W07-P4	n.setasides	no	6.64	1.7816	complex	0
W07-P4	n.setasides	no	6.64	1.7816	complex	0
W07-P4	n.setasides	no	6.64	1.7816	complex	0
W07-P4	n.setasides	no	6.64	1.7816	complex	0
W07-P4	n.setasides	yes	6.64	1.7816	complex	0
W07-P4	n.setasides	yes	6.64	1.7816	complex	0
W09-P5	n.setasides	no	5.14	1.666	complex	6
W09-P5	n.setasides	no	5.14	1.666	complex	3
W09-P5	n.setasides	yes	5.14	1.666	complex	3
W09-P5	n.setasides	yes	5.14	1.666	complex	2
W09-P5	n.setasides	no	5.14	1.666	complex	0
W09-P5	n.setasides	yes	5.14	1.666	complex	0
W09-P5	n.setasides	no	5.14	1.666	complex	0
W09-P5	n.setasides	yes	5.14	1.666	complex	0
W09-P5	n.setasides	yes	5.14	1.666	complex	0
W12-P10	n.setasides	no	6.08	1.904	complex	4
W12-P10	n.setasides	yes	6.08	1.904	complex	6
W12-P10	n.setasides	no	6.08	1.904	complex	8
W12-P10	n.setasides	yes	6.08	1.904	complex	7
W12-P10	n.setasides	no	6.08	1.904	complex	0
W12-P10	n.setasides	yes	6.08	1.904	complex	0
W12-P10	n.setasides	no	6.08	1.904	complex	0
W12-P10	n.setasides	yes	6.08	1.904	complex	0
W12-P10	n.setasides	no	6.08	1.904	complex	0
W12-P10	n.setasides	yes	6.08	1.904	complex	0
W12-P10	n.setasides	no	6.08	1.904	complex	0
W12-P10	n.setasides	yes	6.08	1.904	complex	0
W1401-P7	n.setasides	no	6.05	2.0808	complex	0
W1401-P7	n.setasides	yes	6.05	2.0808	complex	0
W1401-P7	n.setasides	no	6.05	2.0808	complex	0
W1401-P7	n.setasides	no	6.05	2.0808	complex	0
W1401-P7	n.setasides	no	6.05	2.0808	complex	4
W1401-P7	n.setasides	yes	6.05	2.0808	complex	4
W1401-P7	n.setasides	no	6.05	2.0808	complex	8
W1401-P7	n.setasides	yes	6.05	2.0808	complex	4
W1401-P7	n.setasides	yes	6.05	2.0808	complex	0
W1401-P7	n.setasides	no	6.05	2.0808	complex	0
W1401-P7	n.setasides	yes	6.05	2.0808	complex	0
W1401-P7	n.setasides	no	6.05	2.0808	complex	0
W1402-P6	n.setasides	yes	6.61	1.8904	complex	4
W1402-P6	n.setasides	no	6.61	1.8904	complex	4
W1402-P6	n.setasides	yes	6.61	1.8904	complex	0
W1402-P6	n.setasides	no	6.61	1.8904	complex	0
W1402-P6	n.setasides	yes	6.61	1.8904	complex	0
W1402-P6	n.setasides	yes	6.61	1.8904	complex	0
W1402-P6	n.setasides	yes	6.61	1.8904	complex	0
W1402-P6	n.setasides	yes	6.61	1.8904	complex	0
W1402-P6	n.setasides	no	6.61	1.8904	complex	0
W1402-P6	n.setasides	yes	6.61	1.8904	complex	0
W1402-P6	n.setasides	no	6.61	1.8904	complex	0
W1402-P6	n.setasides	yes	6.61	1.8904	complex	0
W1404-P11	n.setasides	no	5.58	1.938	simple	4
W1404-P11	n.setasides	yes	5.58	1.938	simple	4
W1404-P11	n.setasides	no	5.58	1.938	simple	0
W1404-P11	n.setasides	yes	5.58	1.938	simple	0
W1404-P11	n.setasides	yes	5.58	1.938	simple	0
W1404-P11	n.setasides	yes	5.58	1.938	simple	0
W1404-P11	n.setasides	no	5.58	1.938	simple	0
W1404-P11	n.setasides	yes	5.58	1.938	simple	0
W1404-P11	n.setasides	no	5.58	1.938	simple	0
W1404-P11	n.setasides	yes	5.58	1.938	simple	0
W1404-P11	n.setasides	yes	5.58	1.938	simple	0
W1404-P11	n.setasides	no	5.58	1.938	simple	0
W1404-P11	n.setasides	no	5.58	1.938	simple	0
W1404-P11	n.setasides	yes	5.58	1.938	simple	0
W1405-P2	n.setasides	no	6.7	2.142	complex	4
W1405-P2	n.setasides	no	6.7	2.142	complex	0
W1405-P2	n.setasides	yes	6.7	2.142	complex	0
W1405-P2	n.setasides	yes	6.7	2.142	complex	0
W1405-P2	n.setasides	yes	6.7	2.142	complex	0
W1405-P2	n.setasides	no	6.7	2.142	complex	0
W1405-P2	n.setasides	yes	6.7	2.142	complex	0
W1405-P2	n.setasides	no	6.7	2.142	complex	0
W1405-P2	n.setasides	no	6.7	2.142	complex	0
W1405-P2	n.setasides	yes	6.7	2.142	complex	0
W1405-P2	n.setasides	no	6.7	2.142	complex	0
W1405-P2	n.setasides	no	6.7	2.142	complex	0
W1406-P1	n.setasides	no	7.05	2.142	simple	0
W1406-P1	n.setasides	yes	7.05	2.142	simple	0
W1406-P1	n.setasides	yes	7.05	2.142	simple	0
W1406-P1	n.setasides	yes	7.05	2.142	simple	0
W1406-P1	n.setasides	no	7.05	2.142	simple	0
W1406-P1	n.setasides	no	7.05	2.142	simple	1
W1406-P1	n.setasides	yes	7.05	2.142	simple	2
W1406-P1	n.setasides	no	7.05	2.142	simple	0
W1406-P1	n.setasides	no	7.05	2.142	simple	0
W1406-P1	n.setasides	no	7.05	2.142	simple	0
W1406-P1	n.setasides	yes	7.05	2.142	simple	0
W1406-P1	n.setasides	no	7.05	2.142	simple	0
W1407-P3	n.setasides	yes	6.95	1.9856	simple	2
W1407-P3	n.setasides	no	6.95	1.9856	simple	1
W1407-P3	n.setasides	yes	6.95	1.9856	simple	7
W1407-P3	n.setasides	no	6.95	1.9856	simple	11
W1407-P3	n.setasides	no	6.95	1.9856	simple	0
W1407-P3	n.setasides	yes	6.95	1.9856	simple	0
W1407-P3	n.setasides	yes	6.95	1.9856	simple	0
W1407-P3	n.setasides	no	6.95	1.9856	simple	0
W1407-P3	n.setasides	yes	6.95	1.9856	simple	0
W1407-P3	n.setasides	no	6.95	1.9856	simple	0
W1407-P3	n.setasides	yes	6.95	1.9856	simple	0
W1407-P3	n.setasides	no	6.95	1.9856	simple	0
W1412-P13	n.setasides	no	6.65	3.196	simple	0
W1412-P13	n.setasides	no	6.65	3.196	simple	0
W1412-P13	n.setasides	no	6.65	3.196	simple	14
W1412-P13	n.setasides	yes	6.65	3.196	simple	15
W1412-P13	n.setasides	no	6.65	3.196	simple	12
W1412-P13	n.setasides	yes	6.65	3.196	simple	13
W1412-P13	n.setasides	yes	6.65	3.196	simple	0
W1412-P13	n.setasides	yes	6.65	3.196	simple	0
W1412-P13	n.setasides	no	6.65	3.196	simple	0
W1412-P13	n.setasides	yes	6.65	3.196	simple	0
W1412-P13	n.setasides	no	6.65	3.196	simple	0
W1412-P13	n.setasides	yes	6.65	3.196	simple	0
W1413-p14	n.setasides	no	6.86	3.6312	simple	7
W1413-p14	n.setasides	yes	6.86	3.6312	simple	12
W1413-p14	n.setasides	no	6.86	3.6312	simple	0
W1413-p14	n.setasides	yes	6.86	3.6312	simple	0
W1413-p14	n.setasides	yes	6.86	3.6312	simple	0
W1413-p14	n.setasides	no	6.86	3.6312	simple	0
W1413-p14	n.setasides	yes	6.86	3.6312	simple	0
W1413-p14	n.setasides	no	6.86	3.6312	simple	0
W1413-p14	n.setasides	no	6.86	3.6312	simple	0
W1413-p14	n.setasides	yes	6.86	3.6312	simple	0
W1413-p14	n.setasides	no	6.86	3.6312	simple	0
W1413-p14	n.setasides	yes	6.86	3.6312	simple	0
W25b-P8	n.setasides	yes	6.33	1.5844	complex	0
W25b-P8	n.setasides	yes	6.33	1.5844	complex	0
W25b-P8	n.setasides	no	6.33	1.5844	complex	0
W25b-P8	n.setasides	yes	6.33	1.5844	complex	0
W25b-P8	n.setasides	no	6.33	1.5844	complex	0
W25b-P8	n.setasides	yes	6.33	1.5844	complex	0
W25b-P8	n.setasides	no	6.33	1.5844	complex	3
W25b-P8	n.setasides	yes	6.33	1.5844	complex	2
W25b-P8	n.setasides	no	6.33	1.5844	complex	3
W25b-P8	n.setasides	yes	6.33	1.5844	complex	3
W25b-P8	n.setasides	no	6.33	1.5844	complex	0
W25b-P8	n.setasides	no	6.33	1.5844	complex	0

## Sheet: metadata
variables
farm	farm ID (nominal factor)
config	winter wheat field with (w.setasides) or without (n.setasides) set-aside field, factor with two levels
pH	soil pH
SOC	amount of soil organic carbon
landscape	landscape complexity , factor with two levels: simple – simple landscape, complex – complex landscape
nitrogen	fertilizer use, factor with two levels: no- no fertilizer added, yes – fertilizer added
leaf.spots	number of leaf spots infections
